# Supplementary material for: Design of a Novel and Potent Multi-Epitope Chimeric Vaccine against Human Papillomavirus (HPV): An Immunoinformatics Approach
Source: MDPI journal article supplement (doi:10.3390/biomedicines11051493), 2023-05-22
Supplement: s1 [file s1]

# Supplementary Materials

Article

## Design of a Novel and Potent Multi-Epitope Chimeric Vaccine against Human Papillomavirus (HPV): An Immunoinformatics Approach

Muhammad Shahab <sup>1,†</sup>, Dejie Guo <sup>2,†</sup>, Guojun Zheng <sup>1,\*,†</sup> and Yening Zou <sup>2,\*,†</sup>

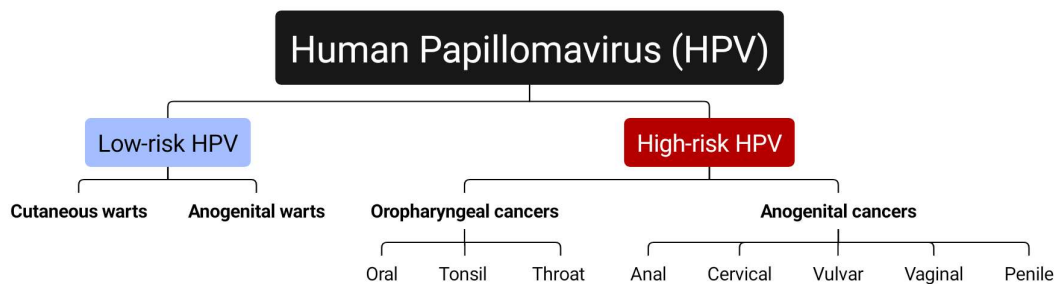

**Figure S1.** Classification of HPV viral types based upon severity.

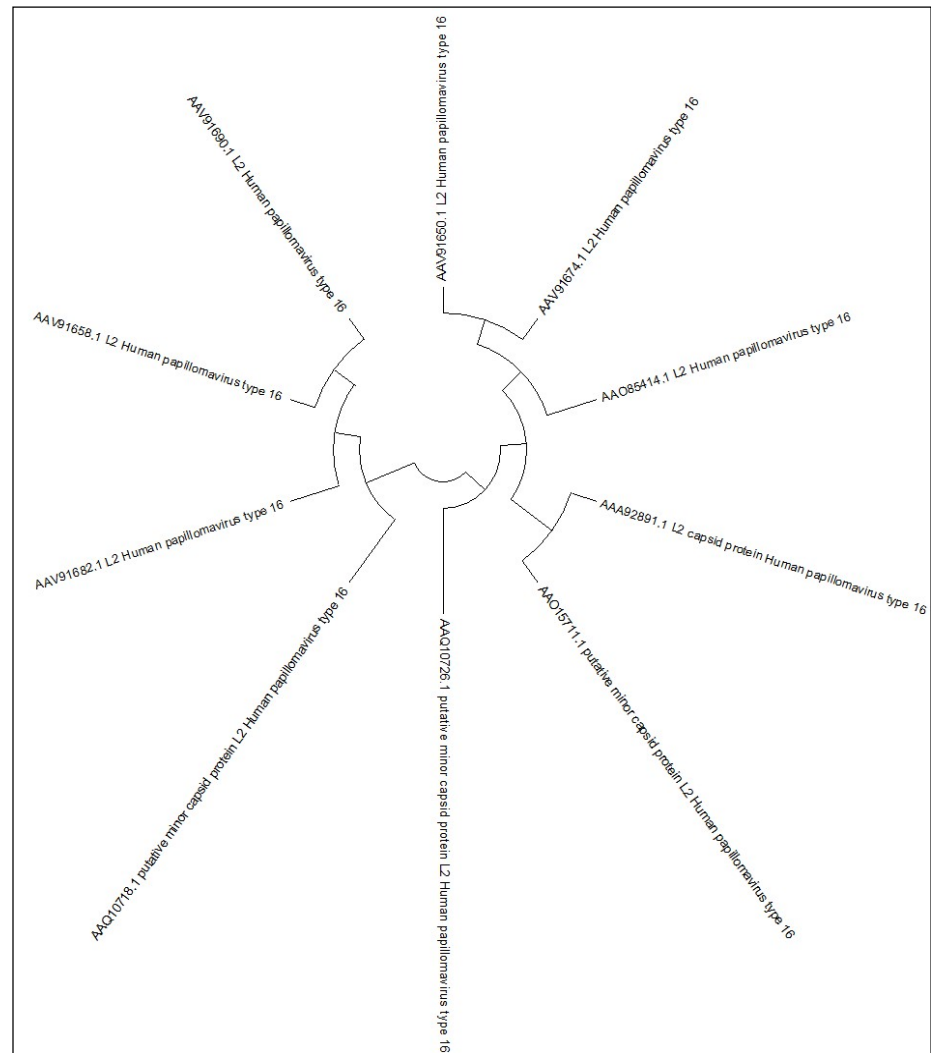

**Figure S2.** Phylogenetic relationship between the studied protein.

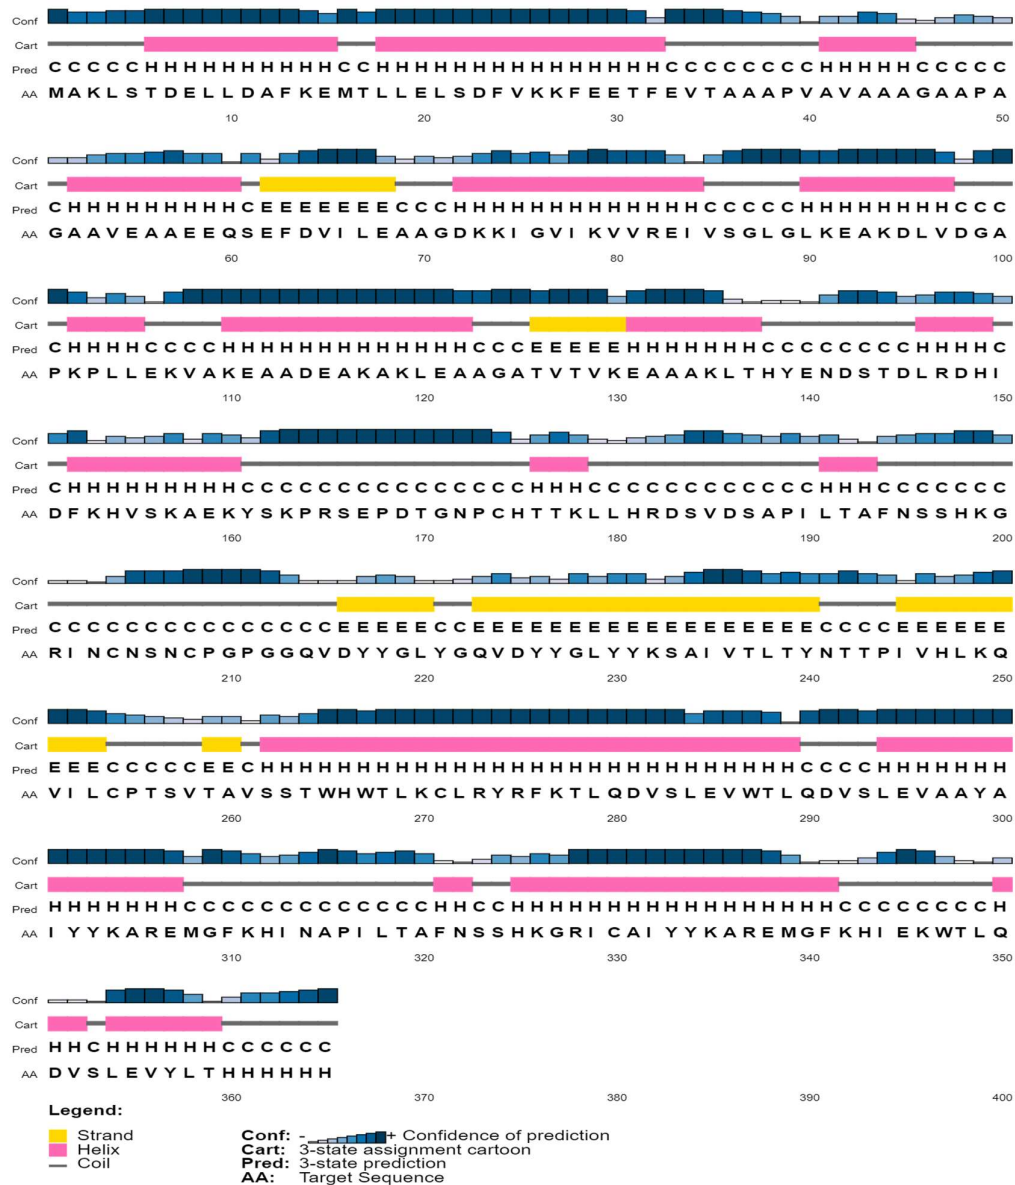

**Figure S3.** Predicted secondary structure of the chimeric vaccine construct representing strand (yellow), helix (magentas), and coil (gray) colour respectively.
